# Supplementary material for: A multifunctional metal–organic framework with a μ3-OH− site for gas and vapor sorption and selective detection of nitrofurantoin
Source: Royal Society of Chemistry journal article supplement (doi:10.1039/d1tc04482f), 2021-12-01
Supplement: d1tc04482f1.pdf [file d1tc04482f1.pdf]

# A multifunctional metal-organic framework with $\mu_3$ -OH site for gas and vapor sorption and selective detection of nitrofurantoin

Yujuan Zhang<sup>a</sup>, Lingling Gao<sup>b</sup>, Sai Ma<sup>a</sup> and Tuoping Hu<sup>\*a</sup>

<sup>a</sup>Department of Chemistry, College of Science, North University of China, Taiyuan 030051, PR China

<sup>b</sup>College of Chemistry and Chemical Engineering, Jinzhong University, Jinzhong 030619, PR China

## Content 1: Calculation method

The molecular size of antibiotics was calculated based on the CPK model.<sup>1</sup> The highest occupied molecular orbital (HOMO) and lowest unoccupied molecular orbital (LUMO) energy levels were calculated using density functional theory (DFT) at the level of B3LYP/6-31G\*.<sup>2</sup> To understand better the interaction between the guest molecules and the Zn<sub>2.5</sub>(DDPP)(OH)(H<sub>2</sub>O) framework, the Grand Canonical Monte Carlo (GCMC) method was used to simulate the optimal adsorption sites of guest molecules in **1**. The MOF structure was set as rigid with atoms frozen at their crystallographic positions during the GCMC simulations. The Lennard-Jones interactions were calculated with a cut off radius of 12.0 Å. For each state point, GCMC simulation consisted of  $2.0 \times 10^7$  steps to guarantee equilibration.

## References

1. Z. Zhang, Y.-W. Liu, H.-R. Tian, X.-H. Li, S.-M. Liu, Y. Lu, Z.-X. Sun, T. Liu and S.-X. Liu, *Matter*, 2020, 2, 250-260.
2. I. M. Abdellah, T. H. Chowdhury, J.-J. Lee, A. Islam, M. K. Nazeeruddin, M. Grätzel and A. El-Shafei, *Sustainable Energy & Fuels*, 2021, 5, 199-211.

Table S1. Selected bond lengths (Å) and angles (deg) for **1**.

| MOF 1                                 |            |                                      |            |                                      |            |
|---------------------------------------|------------|--------------------------------------|------------|--------------------------------------|------------|
| Bond                                  | Dist.      | Bond                                 | Dist.      | Bond                                 | Dist.      |
| Zn1-O1                                | 2.0545(15) | Zn1-O3 <sup>1</sup>                  | 2.1306(18) | Zn1-O5                               | 2.1595(19) |
| Zn1-O6 <sup>1</sup>                   | 2.0672(18) | Zn1-O9                               | 2.164(2)   | Zn1-N1 <sup>2</sup>                  | 2.127(2)   |
| Zn2-O1                                | 1.9818(16) | Zn2-O1 <sup>3</sup>                  | 1.9817(16) | Zn2-O2 <sup>4</sup>                  | 2.4212(17) |
| Zn2-O2 <sup>1</sup>                   | 2.4212(17) | Zn2-O4 <sup>1</sup>                  | 2.0040(17) | Zn2-O4 <sup>4</sup>                  | 2.0040(17) |
| Zn3-O1                                | 1.9615(16) | Zn3-O2 <sup>4</sup>                  | 1.9893(17) | Zn3-O7                               | 1.9080(18) |
| Zn3-O8 <sup>5</sup>                   | 1.9444(18) |                                      |            |                                      |            |
| Angle                                 | (°)        | Angle                                | (°)        | Angle                                | (°)        |
| O1-Zn1-O3 <sup>1</sup>                | 87.82(6)   | O1-Zn1-O5                            | 91.46(7)   | O1-Zn1-O6 <sup>1</sup>               | 101.27(7)  |
| O1-Zn1-O9                             | 84.87(7)   | O1-Zn1-N1 <sup>2</sup>               | 168.38(8)  | O3 <sup>1</sup> -Zn1-O5              | 178.44(7)  |
| O3 <sup>1</sup> -Zn1-O9               | 94.22(8)   | O5-Zn1-O9                            | 87.09(9)   | O6 <sup>1</sup> -Zn1-O3 <sup>1</sup> | 90.55(7)   |
| O6 <sup>1</sup> -Zn1-O5               | 92.07(7)   | O6 <sup>1</sup> -Zn1-O9              | 84.25(8)   | O1 <sup>3</sup> -Zn2-O1              | 185.07(10) |
| O1-Zn2-O2 <sup>4</sup>                | 76.62(6)   | O1 <sup>3</sup> -Zn2-O2 <sup>4</sup> | 86.89(6)   | O1 <sup>3</sup> -Zn2-O2 <sup>1</sup> | 76.62(6)   |
| O1-Zn2-O2 <sup>1</sup>                | 86.89(6)   | O1 <sup>3</sup> -Zn2-O4 <sup>1</sup> | 95.17(7)   | O1-Zn2-O4 <sup>1</sup>               | 98.89(7)   |
| O2 <sup>1</sup> -Zn2-O2 <sup>4</sup>  | 82.63(8)   | O4 <sup>4</sup> -Zn2-O2 <sup>4</sup> | 88.82(7)   | O4 <sup>4</sup> -Zn2-O2 <sup>1</sup> | 170.51(6)  |
| O4 <sup>1</sup> -Zn2-O2 <sup>4</sup>  | 170.51(6)  | O4 <sup>1</sup> -Zn2-O2 <sup>1</sup> | 88.82(7)   | O4 <sup>4</sup> -Zn2-O4 <sup>1</sup> | 99.98(10)  |
| O1-Zn3-O2 <sup>4</sup>                | 88.27(7)   | O7-Zn3-O1                            | 113.11(7)  | O7-Zn3-O2 <sup>4</sup>               | 117.16(8)  |
| O1-Zn3-O8 <sup>5</sup>                | 116.90(9)  | O8 <sup>5</sup> -Zn3-O1              | 110.19(8)  | O8 <sup>5</sup> -Zn3-O2 <sup>4</sup> | 107.62(8)  |
| Zn2-O1-Zn1                            | 121.23(8)  | Zn3-O1-Zn1                           | 119.53(8)  | Zn3-O1-Zn2                           | 103.48(7)  |
| Zn3 <sup>2</sup> -O2-Zn2 <sup>2</sup> | 88.62(6)   | C1-O2-Zn2 <sup>2</sup>               | 137.36(16) | C1-O2-Zn3 <sup>2</sup>               | 129.00(17) |

Symmetry codes: 1:  $I-x, I/2+y, I/2-z$ ; 2:  $I/2+x, I-y, I/2-z$ ; 3:  $I/2-x, 3/2-y, +z$ ; 4:  $-I/2+x, I-y, I/2-z$ ; 5:  $I/2-x, +y, -I/2+z$ .

Table S2. Comparison of H<sub>2</sub>O vapor adsorption values with some references.

| Reported structure                                                                             | H <sub>2</sub> O vapor uptake (cm <sup>3</sup> g <sup>-1</sup> , 298K) | Ref       |
|------------------------------------------------------------------------------------------------|------------------------------------------------------------------------|-----------|
| Cd <sub>2</sub> L <sub>2</sub> (TPA) <sub>2</sub> · 12H <sub>2</sub> O) <sub>n</sub>           | 195                                                                    | 41        |
| {[Zn <sub>4</sub> L <sub>4</sub> (TPA) <sub>4</sub> ] (DMF) · 16H <sub>2</sub> O) <sub>n</sub> | 224                                                                    | 41        |
| {[Co <sub>2</sub> L <sub>2</sub> (TPA) <sub>2</sub> ] · 12H <sub>2</sub> O) <sub>n</sub>       | 184                                                                    | 41        |
| [Cd(bpy)(nbdc)] <sub>n</sub>                                                                   | 163                                                                    | 42        |
| <b>1</b>                                                                                       | 281.9                                                                  | This work |

Table S3. Comparison of the Stern-Volmer Constant (K<sub>sv</sub>) and DL for antibiotic sensing by different MOFs materials.

| Materials                                                             | antibiotics | K <sub>sv</sub> (M <sup>-1</sup> ) | Detection limit | Reference |
|-----------------------------------------------------------------------|-------------|------------------------------------|-----------------|-----------|
| {[Cd <sub>3</sub> (TDCPB) 2DMAc] DMAc 4H <sub>2</sub> O) <sub>n</sub> | NFT         | 1.05 × 10 <sup>5</sup>             | 0.06 mM         | 45        |
| {[Tb(TATMA)(H <sub>2</sub> O) 2H <sub>2</sub> O) <sub>n</sub>         | NFT         | 3.35 × 10 <sup>4</sup>             |                 | 46        |
| [Cd <sub>2</sub> Na(L)(BDC) <sub>2.5</sub> ] 9H <sub>2</sub> O        | NFT         | 3.57 × 10 <sup>4</sup>             | 274 ppb         | 47        |
| [Cd <sub>2</sub> (L)(2,6-NDC) <sub>2</sub> ] DMF 5H <sub>2</sub> O    | NFT         | 7.19 × 10 <sup>4</sup>             | 131 ppb         | 47        |
| [Cd <sub>2</sub> (L)(BPDC) <sub>2</sub> ] DMF 9H <sub>2</sub> O       | NFT         | 6.93 × 10 <sup>4</sup>             | 142 ppb         | 47        |
| <b>1</b>                                                              | NFT         | 9.60 × 10 <sup>5</sup>             | 0.05 mM         | This work |

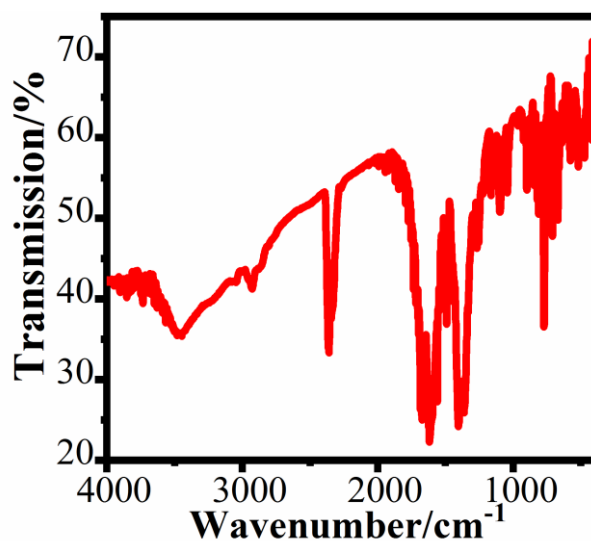

Fig. S1 IR spectrum of 1.

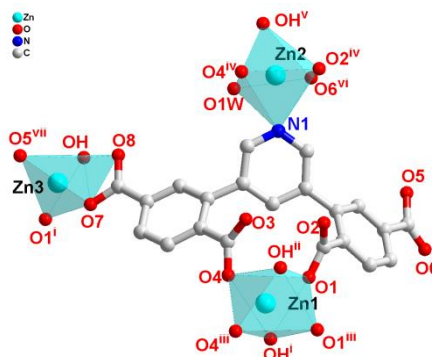

Fig. S2 The Coordination environment of Zn (II) ions. (Symmetry codes: i: 1-x, 1-y, 1-z; ii: -0.5+x, -0.5+y, 1-z; iii: 0.5-x, 0.5-y, z; iv: 1.5-x, 0.5-y, z; v: 2-x, 1-y, 1-z; vi: 0.5+x, 1-y, 0.5-z; vii: 1.5-x, y, 0.5+z. All hydrogen atoms, uncoordinated DMF molecules are omitted for clarity).

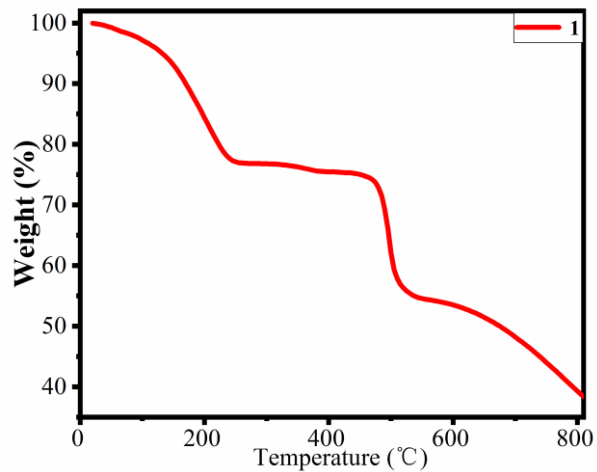

Fig. S3 The TG curve of **1**.

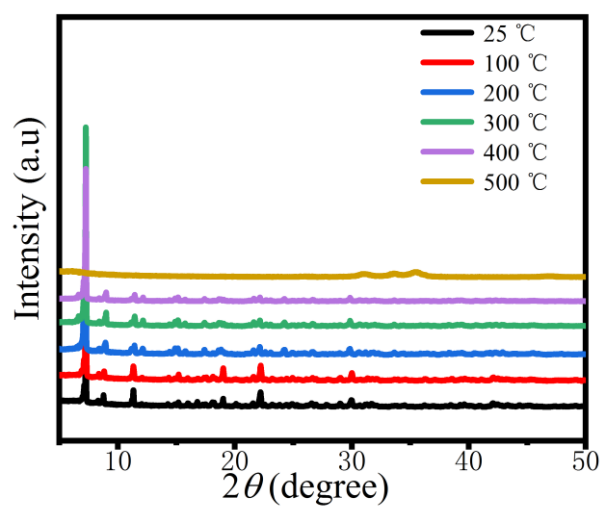

Fig. S4 Variable temperature PXRD patterns of **1**.

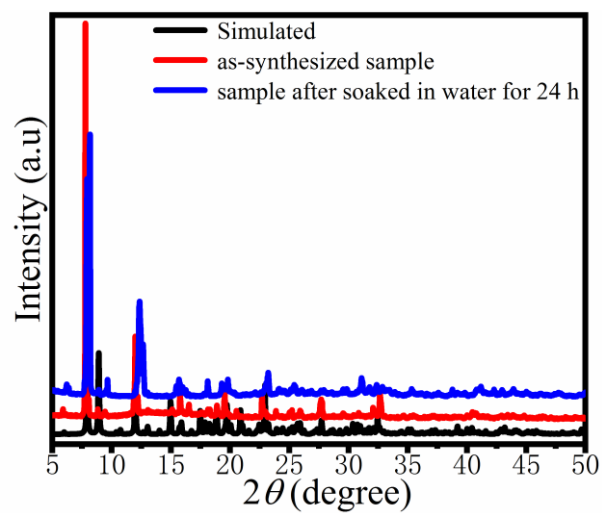

Fig. S5 PXRD pattern of **1**.

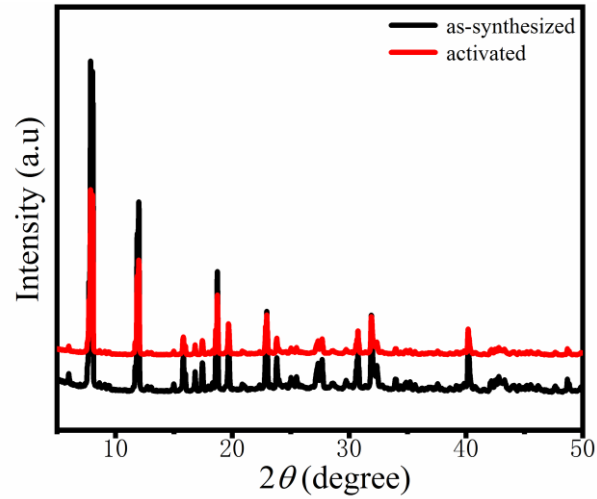

Fig. S6 PXR D patterns of as-synthesized sample and activated sample.

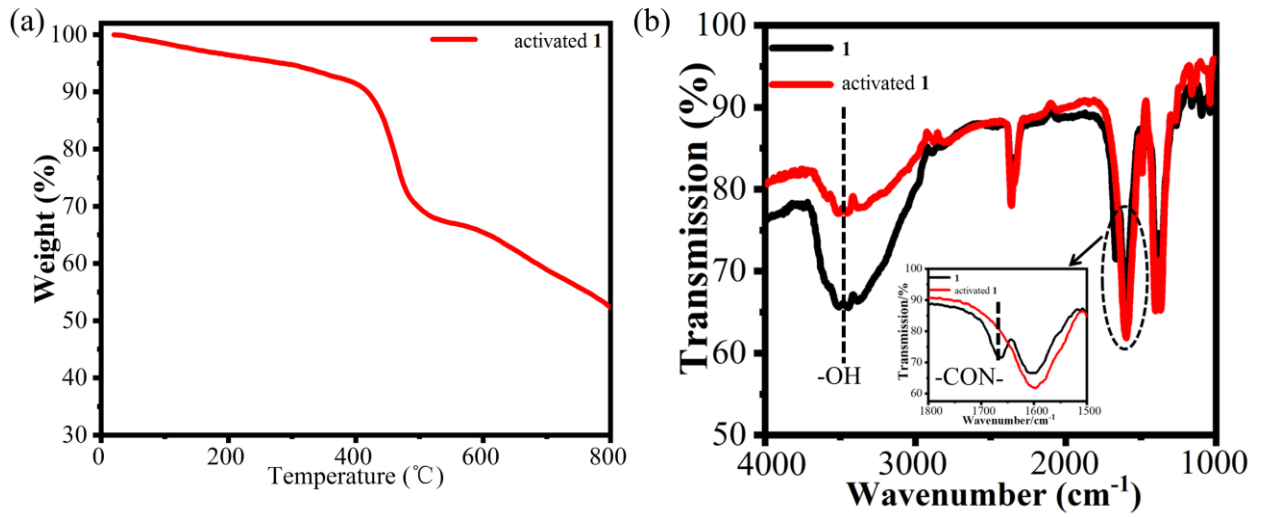

Fig. S7 (a) The TG curve of activated sample. (b) IR spectra of samples before and after being activated.

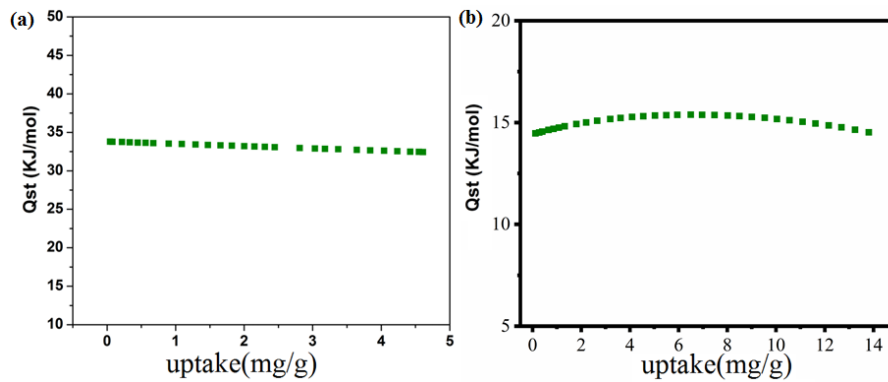

Fig. S8 Isothermic heat ( $Q_{st}$ ) of  $\text{CO}_2$  (a) and  $\text{CH}_4$  (b) adsorption.

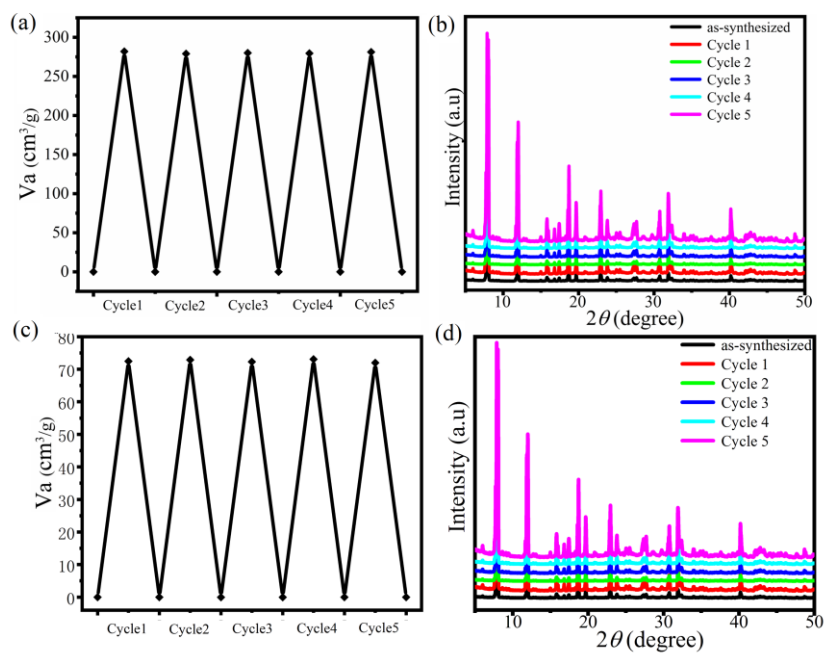

**Fig. S9** (a) Water vapor uptake of **1** after five cycle experiments. (b) PXRD patterns of **1** after five water vapor cycle experiments. (c)  $\text{CH}_3\text{OH}$  vapor uptake of **1** after five cycle experiments. (d) PXRD patterns of **1** after five  $\text{CH}_3\text{OH}$  vapor cycle experiments.

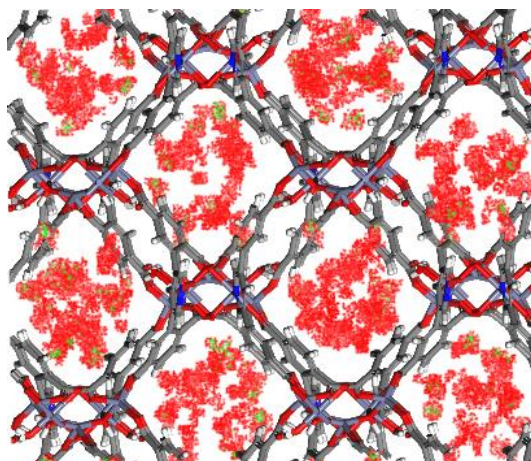

**Fig. S10** The Adsorption distribution of water vapor (red points) and  $\text{CH}_3\text{OH}$  vapor (green points) in **1** by GCMC calculated at 298 K, 1 bar.

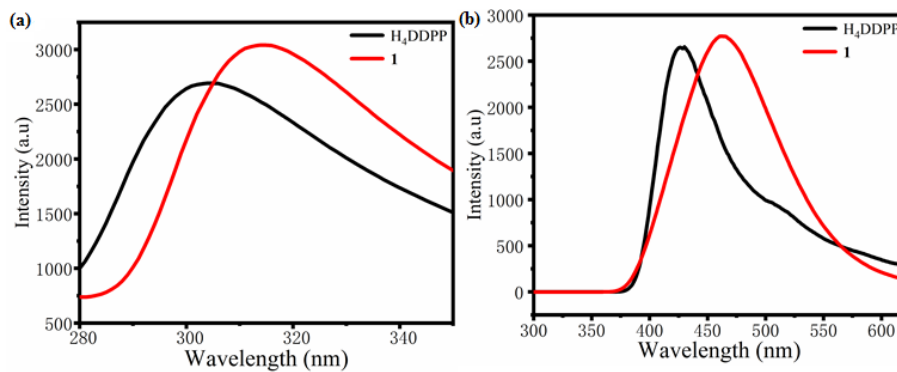

**Fig. S11** (a) The excitation spectra of free ligand  $\text{H}_4\text{DDPP}$  and **1**. (b) The emission spectra of free ligand  $\text{H}_4\text{DDPP}$  and **1**.

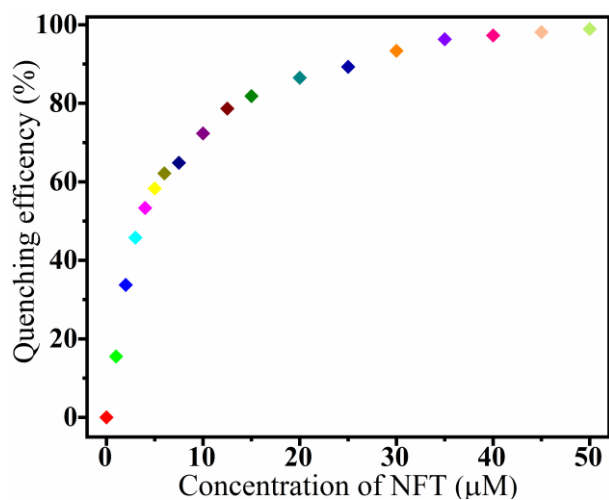

Fig. S12 Quenching rate of NFT for 1.

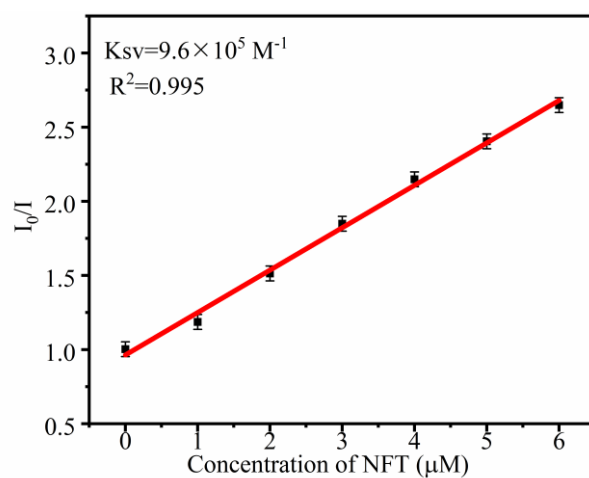

Fig. S13 Stern–Volmer plot for the fluorescence intensity of 1 upon the addition of NFT in water.

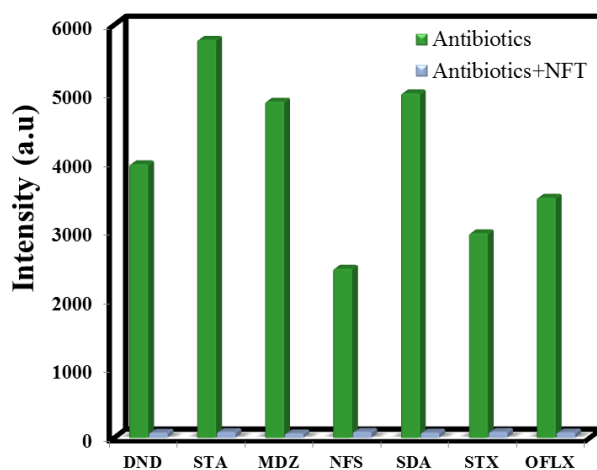

Fig. S14 The competitive quenching experiment of NFT for 1.
